# Supplementary material for: Conditioned medium derived from rat amniotic epithelial cells confers protection against inflammation, cancer, and senescence
Source: PubMed Central journal article supplement (PMC5129913; doi:10.18632/oncotarget.9694), 2016-05-29
Supplement: oncotarget-07-39051-s001.pdf [file oncotarget-07-39051-s001.pdf]

# Conditioned medium derived from rat amniotic epithelial cells confers protection against inflammation, cancer, and senescence

## Supplementary Material

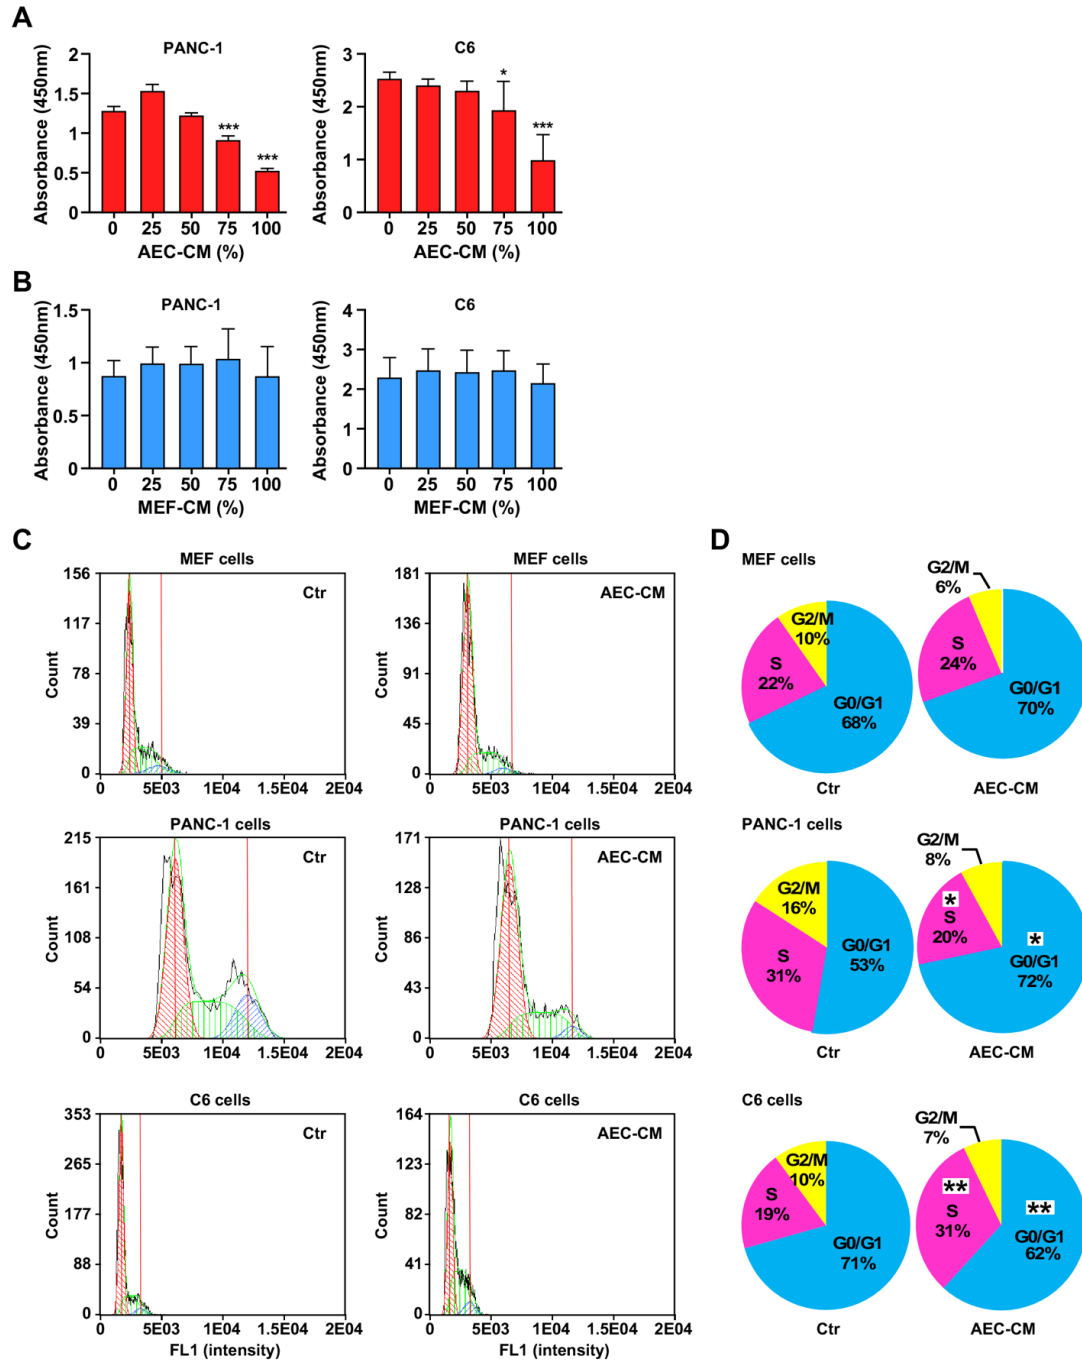

**Supplementary Figure 1.** AEC-CM modulates tumor cell proliferation. PANC-1 and C6 cells were incubated with increasing concentrations of AEC-CM (panel **A**) and MEF-CM (panel **B**)

for 48 h followed by the determination of cell proliferation using a colorimetric assay. **C.** Cell cycle analysis of MEFs, PANC-1 and C6 cell lines after supplementation with Ctr and 100% AEC-CM. Shown in representative of two independent experiments, each performed with triplicate samples. **D.** Quantitative analysis of the number of cells in each cell cycle checkpoint. \*,  $p < 0.05$ ; \*\*,  $p < 0.01$  *versus* Ctr.

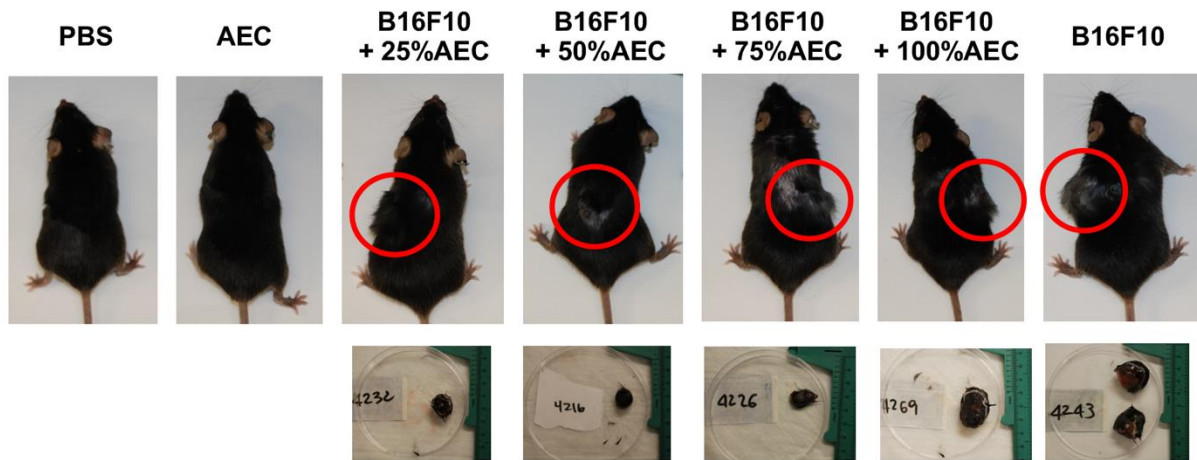

**Supplementary Figure 2.** Co-injection of AECs slows B16F10 tumor growth in C57BL/6J mice. When compared to mice injected with B16F10 alone, co-injection of varying amounts of AECs (100% =  $1 \times 10^6$  cells) with B16F10 cells reduces tumor size. N=6 per group.

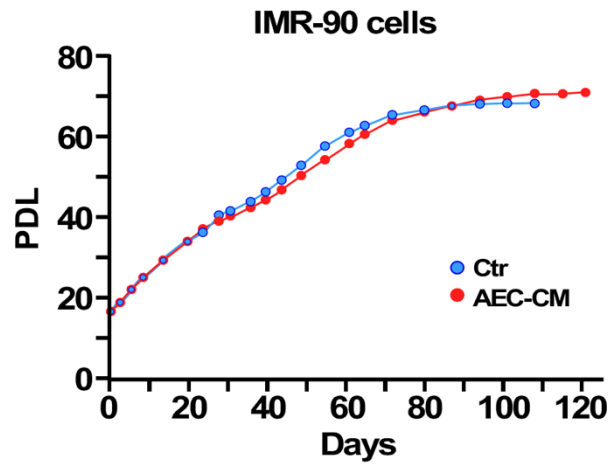

**Supplementary Figure 3.** AEC-CM treatment does not alter the proliferation rate of IMR-90 cells. Growth curves of human IMR-90 fibroblasts supplemented with Ctr and AEC-CM (20%). PDL, population doubling level.

**Supplementary Table 1.** List of primer sequences used for quantitative PCR.

|                   |                          |
|-------------------|--------------------------|
| r Oct4 Fw         | CCCCATTTACCCACACTCTACTC  |
| r Oct4 Rv         | GTGACAGGAACAGAGGGAAAGG   |
| r Nanog Fw        | GCCCTGAGAAGAAAGAAGAG     |
| r Nanog Rv        | CTGACTGCCCCATACTGGAA     |
| r Sox2 Fw         | CTGTTTTTTCATCCCAATTGCA   |
| r Sox2 Rv         | CGGAGATCTGGCGGAGAATA     |
| r GAPDH Fw        | CAGGGCTGCCTTCTCTTGTG     |
| r GAPDH Rv        | CTTGCCGTGGGTAGAGTCAT     |
| r RT1-A Fw        | ATCACCCGGAACAAGTGGGA     |
| r RT1-A Rv        | ATTCAACTGCCAGGTCAGGG     |
| r RT1-D Fw        | AACGGACAACCTGTCACCAA     |
| r RT1-D Rv        | GATGAGCACAATCCCGACGA     |
| r GAPDH Fw        | ACCACAGTCCATGCCATCAC     |
| r GAPDH Rv        | TCCACCACCCTGTTGCTGTA     |
| r Ocn Fw          | TATGGCACCACCGTTTAGGG     |
| r Ocn Rv          | CTGTGCCGTCCATACTTTTCG    |
| r Runx2 Fw        | CAACCACAGAACCACAAGTGC    |
| r Runx2 Rv        | CACTGACTCGGTTGGTCTCG     |
| m TNF $\alpha$ Fw | CCCTCACACTCAGATCATCTTCT  |
| m TNF $\alpha$ Rv | GCTACGACGTGGGCTACAG      |
| m IL10 Fw         | TAAGTGCACCCACTTCCCAG     |
| m IL10 Rv         | AAGGCTTGGCAACCCAAGTA     |
| m IL1 $\beta$ Fw  | GCAACTGTTCCCTGAACTCAACT  |
| m IL1 $\beta$ Rv  | ATCTTTTGGGGTCCTTCAACT    |
| m IL6 Fw          | GACAAAGCCAGAGTCCTTCAGA   |
| m IL6 Rv          | GTCTTGGTCCTTAGCCACTCC    |
| m GAPDH Fw        | GGGTTCCCTATAAATACGGACTGC |
| m GAPDH Rv        | TCTACGGGACGAGGCTGG       |
| h CXCL8 Fw        | GGTGCAGTTTTGCCAAGGAG     |
| h CXCL8 Rv        | TTCCTTGGGGTCCAGACAGA     |
| h IL6 Fw          | ACCCCAATAAATATAGGACTGGA  |
| h IL6 Rv          | TTCTCTTTCGTTCCCGGTGG     |
| h IGFBP1 Fw       | TCACAGCAGACAGTGTGAGAC    |
| h IGFBP1 Rv       | CCATTCCAAGGGTAGACGCA     |
| h Ccl5 Fw         | CAGTCGTCCACAGGTCAAGG     |

|                  |                       |
|------------------|-----------------------|
| h Ccl5 Rv        | CTTG TTCAGCCGGGAGTCAT |
| h p16ink4 Fw     | ACTTCAGGGGTGCCACATTC  |
| h p16ink4 Rv     | CGACCCTGTCCCTCAAATCC  |
| h GAPDH Fw       | CTCTGCTCCTCCTGTTTCGAC |
| h GAPDH Rv       | GCGCCCAATACGACCAAATC  |
| r TGFb Fw        | AGGGCTACCATGCCAACTTC  |
| r TGFb Rv        | CCACGTAGTAGACGATGGGC  |
| r IL10 Fw        | CCTCTGGATACAGCTGCGAC  |
| r IL10 Rv        | GTAGATGCCGGGTGGTTCAA  |
| r IL6 Fw         | AGCCAGAGTCATTCAGAGCAA |
| r IL6 Rv         | ATTGGAAGTTGGGGTAGGAAG |
| r IL1 $\beta$ Fw | GACTTCACCATGGAACCCGT  |
| r IL1 $\beta$ Rv | GGAGACTGCCCATTTCTCGAC |

**Supplementary Table 2.** List of commercial antibodies used for confocal microscopy.

|                                              |                                    |
|----------------------------------------------|------------------------------------|
| SOX-2 (1:100) Santa Cruz Biotech. [sc-17320] | Anti-goat Alexa564 (1:500) Sigma   |
| Nanog (1:50) Abcam [ab106465]                | Anti-rabbit Alexa488 (1:500) Sigma |
| OCT-4 (1:100) Santa Cruz Biotech.[sc-5279]   | Anti-mouse Alexa488 (1:500) Sigma  |
| TRA-1-60 (1:100) Cell Signaling [#4746]      | Anti-mouse Alexa488 (1:500) Sigma  |
| NF- $\kappa$ B p65 (1:100) Abcam [ab32536]   | Anti-rabbit Alexa488 (1:500) Sigma |
| IL-6 (1:50) R&D System [AF-206-NA]           | Anti-goat Alexa564 (1:500) Sigma   |
| Gamma H2AX(1:1000) Abcam [ab81299]           | Anti-rabbit Alexa488 (1:500) Sigma |
| Ki-67 (1:100) Santa Cruz Biotech. [sc-23900] | Anti-mouse Alexa564 (1:500) Sigma  |
